# Supplementary material for: Comparison of Early-Onset Sepsis Risk-Stratification Algorithms in Neonates in a Kenyan Nursery
Source: Oxford University Press journal article supplement (doi:10.1542/hpeds.2021-006228), 2022-09-21
Supplement: hpeds.2021-006228supplementarydata.pdf [file hpeds.2021-006228supplementarydata.pdf]

## Supplemental Information

**SUPPLEMENTAL TABLE 5** Distributions of Risk Factors of Patients Categorized as High Risk by the Simple RSA but Disagreed by CE-M RSA

| Risk Factor      | Present | Low Risk by CE-M RSA ( <i>n</i> = 23) | Intermediate Risk by CE-M RSA ( <i>n</i> = 45) |
|------------------|---------|---------------------------------------|------------------------------------------------|
| Sick looking     | No      | 23 (100%)                             | 41 (91.1%)                                     |
|                  | Yes     | —                                     | 4 (8.9%)                                       |
| Birth Wt <1500g  | No      | 23 (100%)                             | 45 (100%)                                      |
| Maternal fever   | No      | 19 (90.5%)                            | 44 (97.8%)                                     |
|                  | Yes     | 2 (9.5%)                              | 1 (2.2%)                                       |
|                  | Missing | 2                                     | —                                              |
| Chorioamnionitis | No      | 11 (47.8%)                            | 39 (88.6%)                                     |
|                  | Yes     | 12 (52.2%)                            | 5 (11.4%)                                      |
|                  | Missing | —                                     | 1                                              |
| Infant fever     | No      | 23 (100%)                             | 10 (22.2%)                                     |
|                  | Yes     | —                                     | 35 (77.8%)                                     |
| Hypothermia      | No      | 23 (100%)                             | 38 (84.4%)                                     |
|                  | Yes     | —                                     | 7 (15.6%)                                      |
| Lethargy         | No      | 22 (95.7%)                            | 43 (95.6%)                                     |
|                  | Yes     | 1 (4.3%)                              | 2 (4.4%)                                       |

—, not applicable.

**SUPPLEMENTAL TABLE 6** Distributions of Risk Factors of Patients Categorized as Intermediate Risk by the Simple RSA but Disagreed by CE-M RSA

| Risk Factor      | Present | Low Risk by CE-M ( <i>n</i> = 102) |
|------------------|---------|------------------------------------|
| Gestational age  | No      | 91 (89.2%)                         |
|                  | Yes     | 11 (10.8%)                         |
| PROM             | No      | 7 (6.9%)                           |
|                  | Yes     | 95 (93.1%)                         |
| Birth wt <2500 g | No      | 99 (97.1%)                         |
|                  | Yes     | 3 (2.9%)                           |
| Apgar at 1 min   | No      | 102 (100%)                         |
| Oxygen use       | No      | 102 (100%)                         |
